# Supplementary material for: Vortex formation of spherical self-propelled particles around a circular obstacle
Source: Royal Society of Chemistry journal article supplement (doi:10.1039/d0sm00277a), 2020-01-01
Supplement: d0sm00277a1.pdf [file d0sm00277a1.pdf]

## Vortex formation of spherical self-propelled particles around a circular obstacle

Jun-xing Pan,<sup>a</sup> Hua Wei,<sup>a</sup> Mei-jiao Qi,<sup>a</sup> Hui-fang Wang,<sup>a</sup> Jin-jun Zhang,<sup>\*a</sup> Wen-de Tian,<sup>\*bc</sup> and Kang Chen<sup>\*ab</sup>

<sup>a</sup>*School of Physics and Information Engineering, Shanxi Normal University, Linfen 041004, China*

<sup>b</sup>*Center for Soft Condensed Matter Physics & Interdisciplinary Research, School of Physical Science and Technology, Soochow University, Suzhou 215006, China*

<sup>c</sup>*Department of Chemical Engineering, Macromolecular Science and Engineering, University of Michigan, Ann Arbor, Michigan 48109, USA*

Movie 1: Particle vortex around the obstacle (VS). ( $D_r = 0.001$ ,  $R = 15$  and  $\phi = 0.15$ ).

Movie 2: pSPPs (red) and nSPPs (green) around the obstacle in the VS. ( $D_r = 0.001$ ,  $R = 15$  and  $\phi = 0.15$ ).

Movie 3: Particles around the obstacle in the RS. ( $D_r = 0.001$ ,  $R = 10$  and  $\phi = 0.15$ ).

Movie 4: Particles around the obstacle in the TS. The movie shows the time period of the reversal of the orbiting direction. ( $D_r = 0.001$ ,  $R = 10$  and  $\phi = 0.2$ ).
